# Supplementary material for: FBLN5 is targeted by microRNA-27a-3p and suppresses tumorigenesis and progression in high-grade serous ovarian carcinoma
Source: PubMed Central journal article supplement — Oncol Rep. 2020 Sep 3;44(5):2143–51. doi: 10.3892/or.2020.7749 (PMC7550983; doi:10.3892/or.2020.7749), 2020-09-03
Supplement: Supplementary_Data.pdf [file Supplementary_Data.pdf]

Figure S1. Representative images of IHC staining of FBLN5 and H&E in xenograft tumor tissues. IHC, immunohistochemical; FBLN5, fibulin-5; H&E, hematoxylin-eosin.

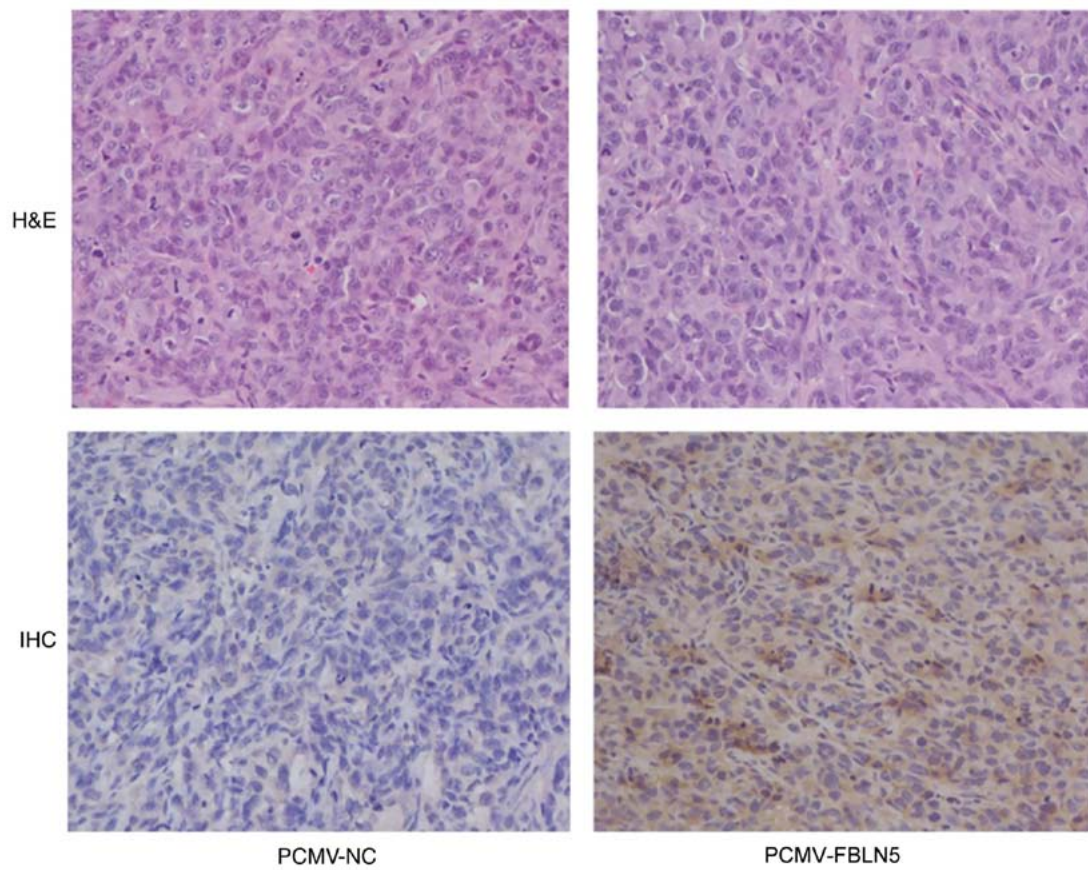

Table SI. Primer sequences used for PCR. siRNA and miRNA sequences are also presented.

A, Primer sequences used for qPCR

| Gene             | Primer sequences (5' to 3') |
|------------------|-----------------------------|
| $\beta$ -actin-F | CATGTACGTTGCTATCCAGGC       |
| $\beta$ -actin-R | CTCCTTAATGTCACGCACGAT       |
| FBLN5-F          | TCGCCAGTCAGGACAGTGT         |
| FBLN5-R          | AGTAGGGGTTTCGAGTAGGGC       |

B, siRNA sequences

|               | Sequences (5' to 3')        |
|---------------|-----------------------------|
| FBLN5-siRNA-F | GGCAGAGAAUUUUACAUGC GGCAAAG |
| FBLN5-siRNA-R | UUUGCCGCAUGUAAAAUUCUCUGCCAU |

C, miRNA sequences

|                       |                       |
|-----------------------|-----------------------|
| miR-27a-3p mimics-F   | UUCACAGUGGCUAAGUCCGC  |
| miR-27a-3p mimics-R   | GGAACUUAGCCACUGUGAAUU |
| miR-27a-3p inhibitors | GCGGAACUUAGCCACUGUGAA |

FBLN5, fibulin-5; qPCR, quantitative PCR; miR-27a-3p, microRNA-27a-3p; F, forward; R, reverse.
